# Supplementary material for: Core-Sheath Electrospun Nanofibers Based on Chitosan and Cyclodextrin Polymer for the Prolonged Release of Triclosan
Source: MDPI journal article supplement (doi:10.3390/polym14101955), 2022-05-11
Supplement: s1 [file s1]

Article

# Core-Sheath Electrospun Nanofibers Based on Chitosan and Cyclodextrin Polymer for the Prolonged Release of Triclosan

Safa Ouerghemmi <sup>1</sup>, Stéphanie Degoutin <sup>1,\*</sup>, Mickael Maton <sup>2</sup>, Nicolas Tabary <sup>1</sup>, Frédéric Cazaux <sup>1</sup>, Christel Neut <sup>3</sup>, Nicolas Blanchemain <sup>2</sup> and Bernard Martel <sup>1</sup>

<sup>1</sup> Univ. Lille, CNRS, INRAE, Centrale Lille, UMR 8207-UMET-Unité Matériaux et Transformations, F-59000 Lille, France; safa.ouergemmi@gmail.com (S.O.); nicolas.tabary@univ-lille.fr (N.T.); frederic.cazaux@univ-lille.fr (F.C.); bernard.martel@univ-lille.fr (B.M.)

<sup>2</sup> Univ. Lille, Inserm, CHU Lille, U1008, Controlled Drug Delivery Systems and Biomaterials, F-59000 Lille, France; mickael.maton@univ-lille.fr (M.M.); nicolas.blanchemain@univ-lille.fr (N.B.)

<sup>3</sup> Univ. Lille, Inserm, CHU Lille, U1286 INFINITE, Laboratory of Bacteriology, College of Pharmacy, F-59000 Lille, France; christel.neut@univ-lille.fr

\* Correspondence: stephanie.degoutin@univ-lille.fr

## Supplementary Information

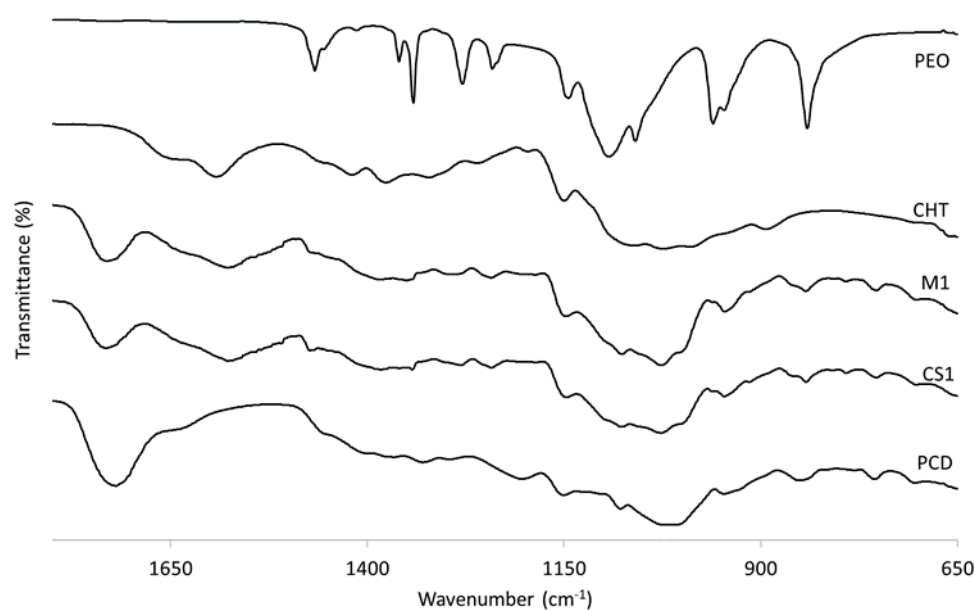

**Figure S1.** ATR-FTIR spectra of PEO, CHT, PCD powders and M1 and CS1 NFs.

**Citation:** Ouerghemmi, S.; Degoutin, S.; Maton, M.; Tabary, N.; Cazaux, F.; Neut, C.; Blanchemain, N.; Martel, B. Core-Sheath Electrospun Nanofibers Based on Chitosan and Cyclodextrin Polymer for the Prolonged Release of Triclosan. *Polymers* **2022**, *14*, 1955. <https://doi.org/10.3390/polym14101955>

Academic Editor: Andreea-Teodora Iacob

Received: 18 March 2022

Accepted: 7 May 2022

Published: 11 May 2022

**Publisher's Note:** MDPI stays neutral with regard to jurisdictional claims in published maps and institutional affiliations.

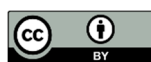

**Copyright:** © 2022 by the authors. Licensee MDPI, Basel, Switzerland. This article is an open access article distributed under the terms and conditions of the Creative Commons Attribution (CC BY) license (<https://creativecommons.org/licenses/by/4.0/>).
